# Supplementary material for: F–Bi4TaO8Cl flower-like hierarchical structures: controlled preparation, formation mechanism and visible photocatalytic hydrogen production
Source: Royal Society of Chemistry journal article supplement (doi:10.1039/c6ra25046g), 2016-12-22
Supplement: c6ra25046g1.pdf [file c6ra25046g1.pdf]

## Supplementary Materials

### **F-Bi<sub>4</sub>TaO<sub>8</sub>Cl flower-like hierarchical structures: Controlled preparation, formation mechanism, and visible photocatalytic hydrogen production**

Muhammad Nawaz<sup>a,b</sup>, Fangzhi Mou,<sup>a</sup> Leilei Xu,<sup>a</sup> Hao Tu,<sup>a</sup> Jianguo Guan<sup>\*, a</sup>

*<sup>a</sup>State Key Laboratory of Advanced Technology for Materials Synthesis and Processing, Wuhan University of Technology, Wuhan 430070, P. R. China*

*<sup>b</sup>Department of Nano-Medicine Research, Institute for Research and Medical Consultations (IRMC), University of Dammam, Dammam 31441, Saudi Arabia*

---

\*Corresponding author. Fax: +86-27-87879468.  
E-mail: [guanjg@whut.edu.cn](mailto:guanjg@whut.edu.cn)

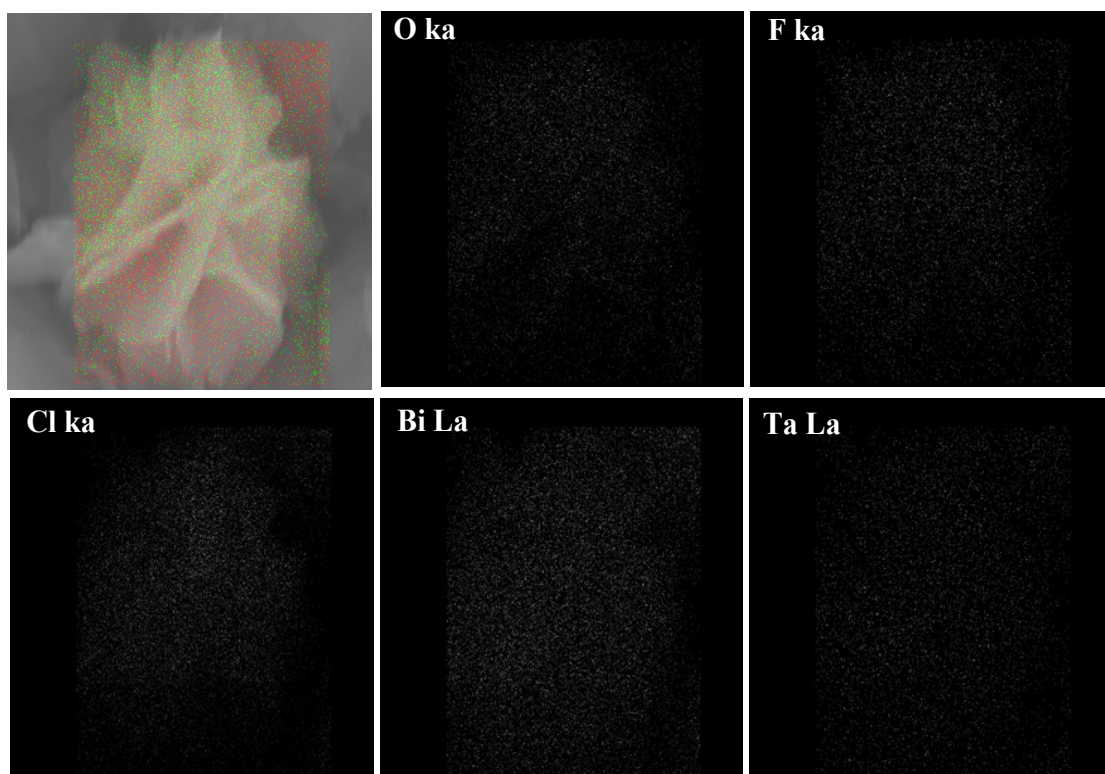

**Fig. S1**  
EDX map  
ping of F-  
 $\text{Bi}_4\text{TaO}_8\text{Cl}$ ,  
show  
ing prese  
nce of O,  
F, Cl,  
Bi,  
and  
Ta

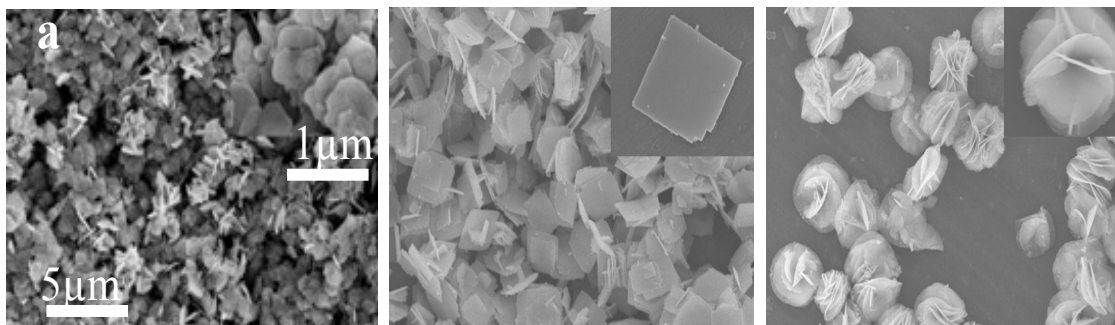

**Fig. S2** SEM images of  $\text{Bi}_3\text{O}_4\text{Cl}$  (a)  $\text{F-Bi}_3\text{O}_4\text{Cl}$  (b)  $\text{F-Bi}_4\text{TaO}_8\text{Cl}$  (c) prepared at 150 °C for 24 h.
